# Supplementary material for: Neurofilament Light Chain Concentration in Cerebrospinal Fluid in Children with Acute Nontraumatic Neurological Disorders
Source: MDPI journal article supplement (doi:10.3390/children11030360), 2024-03-19
Supplement: s1 [file s1]

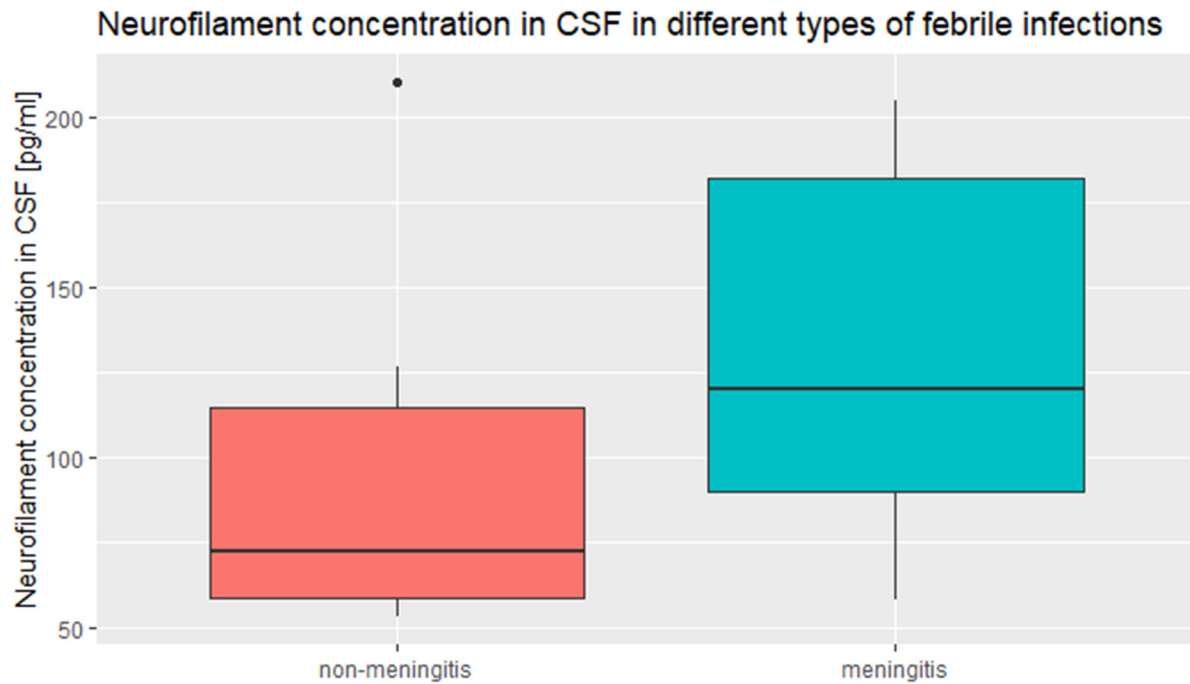

**Figure S1:**

Comparison of cNfL levels of the meningitis patients (n = 10) with the group of all febrile non-meningitis children (n = 10; complex febrile seizure + febrile infection). There was no significant difference between cNfL levels in children with meningitis (median 120.5 pg/mL; range 58.1-205.4 pg/mL) and febrile non-meningitis children (median 72.5 pg/ml; range 53.3-210.8; p = 0.14).
