# Supplementary material for: Neurofilament Light Chain Concentration in Cerebrospinal Fluid in Children with Acute Nontraumatic Neurological Disorders
Source: Children (Basel). 2024 Mar 19;11(3):360. doi: 10.3390/children11030360 (PMC10969464; doi:10.3390/children11030360)
Supplement: Supplementary file 1 [file children-11-00360-s001.zip › children-2838159-supplementary.xlsx]

## Sheet: Tabe S1
study ID	diagnosis	concomitant disease	age (years)	gender	weight [kg]	height [m]	BMI [kg/m²]	NfL	CSF cells/µl	CSF protein [mg/dl]	CSF glucose	pathogen	CRP [mg/l]	leucocytes [/nl]	pH	lactate [mmol/l]	antibiotic treatment	seizure duration	opening CSF pressure [cm H2O]
136	lyme neuroborreliosis	none	7	male	31	137	16.5	98.7	87	30.7	56	borrelia IgG/IgM	<1	6.8	7.34	1	Cefotaxim, Ceftriaxon
143	lyme neuroborreliosis	none	3	female	16	97	17	153.4	55	23	53	borrelia IgG	<1	9.7	7.38	1.8	Cefotaxim, Ceftriaxon
162	lyme neuroborreliosis	none	8	male	22	124	14.2	87.8	84	2024-01-13	64	borrelia IgG/IgM	<1	6.7	7.43	0.8	Cefotaxim
171	lyme neuroborreliosis	polyradiculopathy, involvement of cranial nerves	12	female	45.5	156	18.7	205.4	55	94.7	56	borrelia IgG/IgM	<1	10	NA	NA	Cefotaxim, Ceftriaxon, Doxycyclin
201	lyme neuroborreliosis	none	8	female	30	139	15.6	201.7	13	21.7	52	borrelia IgM (Serum)	8	7.1	7.43	1.3	Cefotaxim
202	lyme neuroborreliosis	trisomy 21,failure to thrive, tricuspid insufficiency I	11	male	31	130	18.2	142.3	140	51.4	56	borrelia IgM/IgG	1	6	7.39	1.6	Cefotaxim, Ceftriaxon
49	Bell`s palsy	none	2	female	13.2	95.5	14.5	49.2	1	13	50	none	1	8.2	7.41	1	none
75	Bell`s palsy	obesity	7	female	45	126.5	28.1	98	2	29.3	63	none	<1	12.5	7.41	1.8	none
81	Bell`s palsy	none	14	female	65.5	163	24.7	144.5	7	37.8	55	none	5	6.3	NA	NA	none
133	Bell`s palsy	bronchial asthma	12	female	41	165	15.1	48.8	12	20.3	55	none	<1	5.2	7.41	0.7	Cefotaxim, Ceftriaxon
166	Bell`s palsy	strain of cervical spine	12	female	48	150	21.3	88.6	3	25	63	none	<1	8	7.4	2.1	none
153	viral meningitis (enteroviruses)	pneumonia, recurrent obstructive bronchitis	3	female	12.5	96	13.6	58.1	719	41.8	49	enteroviruses	3	24.6	7.45	1.9	Ampicillin, Cefotaxim
163	viral meningitis (enteroviruses)	none	6	male	24.6	NA	NA	72.5	85	22.8	51	enteroviruses	5	11.8	7.42	2	Cefotaxim
186	viral meningitis (enteroviruses)	none	3	female	17.5	102	16.8	95.6	280	36	57	enteroviruses	2	10.2	7.4	1.3	Cefotaxim
185	bacterial meningitis (pneumococcus)	dichotomous renal pelvis on the left	0.25	male	4.9	60	13.8	192.3	5600	560.7	4	pneumococcus	20/206	13	7.59	2.9	Ampicillin, Cefotaxim
11	Complex febrile seizure/ status epilepticus	group A streptococcal tonsillitis	1	male	13.45	NA	NA	56	3	13.6	71	none	10	21.9	7.24	3.6	Ampicillin, Cefotaxim	10 min
156	Complex febrile seizure/ status epilepticus	high-fever nonspecific infection	0.833333	male	9.2	83	13.4	58.3	2	18.8	99	none	108	17.2	7.43	2.1	Cefotaxim, Cefuroxim,Aciclovir	>10 min
203	Complex febrile seizure/ status epilepticus	infection of upper airways; perinatal asphyxia	3	male	13	NA	NA	53.2	1	25.5	59	non	<1	10.7	7.45	0.9	Cefotaxim, Aciclovir	unknown
62	exclusion of meningitis (Lymphadenitis colli)	glandular hypospadia	3	male	21.5	117	15.7	64	2	19.4	77	none	44	19.4	7.53	1.5	Cefuroxim
70	exclusion of meningitis (febrile nonspecific infection)	none	0.25	female	7.6	64	18.6	210.8	4	32.8	65	none	6	17.7	7.41	3.6	Ampicillin, Cefotaxim
72	exclusion of meningitis (febrile nonspecific infection)	none	0.25	female	5.57	60.5	15.2	126.8	1	21.4	52	none	14	16.3	7.5	1.5	Ampicillin, Cefotaxim
101	exclusion of meningitis (tonsillitis)	ADHD, depression	12	male	51	150	22.7	118.6	2	24.6	69	none	55	19.5	7.4	0.9	none
104	exclusion of meningitis (prolonged high-fever infection)	none	1	male	10.7	78.5	17.4	80.9	2	22.3	64	none	174	17.6	7.39	0.9	Cefuroxim, Clarithromycin
115	exclusion of meningitis (febrile nonspecific infection)	none	0.25	female	5.2	57	16	103.9	1	17.7	56	none	28	20.9	7.51	2.1	Ampicillin, Cefotaxim
173	exclusion of meningitis (febrile gastroenteritis)	none	16	female	61	170	21.1	60.1	2	20.9	57	none	19	9.8	7.42	1.3	none
23	Idiopathic intracranial hypertension (DD migraine)	none	8	female	27	124	17.6	74.9	1	20.2	54	none	2	11.6	7.46	NA	none		47
71	Idiopathic intracranial hypertension	none	11	male	51.5	154	21.9	60.1	0	19.5	50	none	2	6	NA	NA	none		23
125	Idiopathic intracranial hypertension	none	13	female	57	161.5	21.9	124.6	1	29.1	55	none	1	5	NA	NA	none		20
182	Idiopathic intracranial hypertension	none	8	male	29	130	17.1	119.3	1	30	55	none	<1	9.7	NA	NA	none		42
126	idiopathic trochlear nerve palsy	nonspecific infection of upper airways	3	male	14.5	95.5	15.9	163.8	1	12	54	none	1	8.2	NA	NA	none
131	epilepsy (status epilepticus)	none	8	male	40	NA	NA	95.3	2	15.4	57	none	<1	7.1	7.41	1.9	Aciclovir
145	suspicion of PANDAS-Syndrome	atypical autism, tics, language disorder	9	male	27.9	132	16	71.1	11	16.6	55	none	<1	5.7	NA	NA	none
147	sinus vein thrombosis with abducens nerve palsy	none	8	female	33.5	131	19.5	811.9	3	23.9	49	none	<1	5	7.31	1.1	none		11
160	headache and neck pain, dizziness	Silver-Russel-Syndrome	15	female	40	150	17.8	124.4	2	20.3	53	none	1	7.8	7.53	1	none
172	schizophrenia-like psychiotic disorder; T2- lesions in cMRT	obesity, impairment of cognition	17	male	115	196	29.9	1041.7	18	187.3	57	none	1	5.8	7.34	1.5	none
